# Supplementary material for: Efficient Al Recovery from Aluminum Dross with Simultaneous AlN Separation by a Mechanical Method
Source: MDPI journal article supplement (doi:10.3390/waste1010004), 2022-09-26
Supplement: s1 [file s1]

# Supplemental

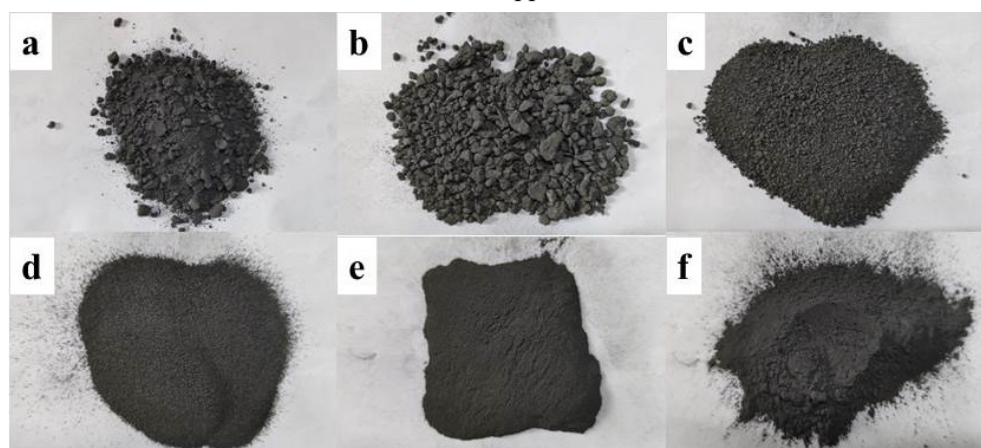

Figure S1:Secondary aluminum dross sieving size range

(a: raw AD, b: >2mm,c: 0.425-2mm,d: 0.15-0.425mm,e: 0.08-0.15mm,f: <0.08mm)

Table S1 element distribution of different particle sizes aluminum dross after different steel bar grinding time

| Time  | element | >2 mm | 0.425-2mm | 0.15-0.425mm | 0.08-0.15mm | <0.08mm |
|-------|---------|-------|-----------|--------------|-------------|---------|
| 3min  | Al(%)   | 34.2  | 35.5      | 38.2         | 39.3        | 39.1    |
|       | Si(%)   | 10.5  | 10.5      | 8.06         | 6.86        | 6.25    |
| 5min  | Al(%)   | 29.8  | 38.1      | 38.9         | 39.7        | 39.2    |
|       | Si(%)   | 13.5  | 8.65      | 8.1          | 6.81        | 5.95    |
| 10min | Al(%)   | 36.9  | 38.5      | 37.6         | 39.2        | 39      |
|       | Si(%)   | 10.2  | 9.09      | 8.56         | 6.64        | 6.37    |

Table S2 element distribution of different particle sizes aluminum dross after different steel ball grinding time

| Time  | element | >2 mm | 0.425-2mm | 0.15-0.425mm | 0.08-0.15mm | <0.08mm |
|-------|---------|-------|-----------|--------------|-------------|---------|
| 3min  | Al(%)   | 25.00 | 45.86     | 50.84        | 27.45       | 4.11    |
|       | Si(%)   | 5.77  | 7.57      | 6.02         | 12.42       | 16.44   |
| 5min  | Al(%)   | 15.38 | 55.67     | 32.32        | 26.90       | 32.69   |
|       | Si(%)   | 19.23 | 6.80      | 6.40         | 11.17       | 21.15   |
| 10min | Al(%)   | 5.56  | 44.05     | 35.39        | 33.01       | 46.81   |
|       | Si(%)   | 5.56  | 7.57      | 8.71         | 9.09        | 23.40   |

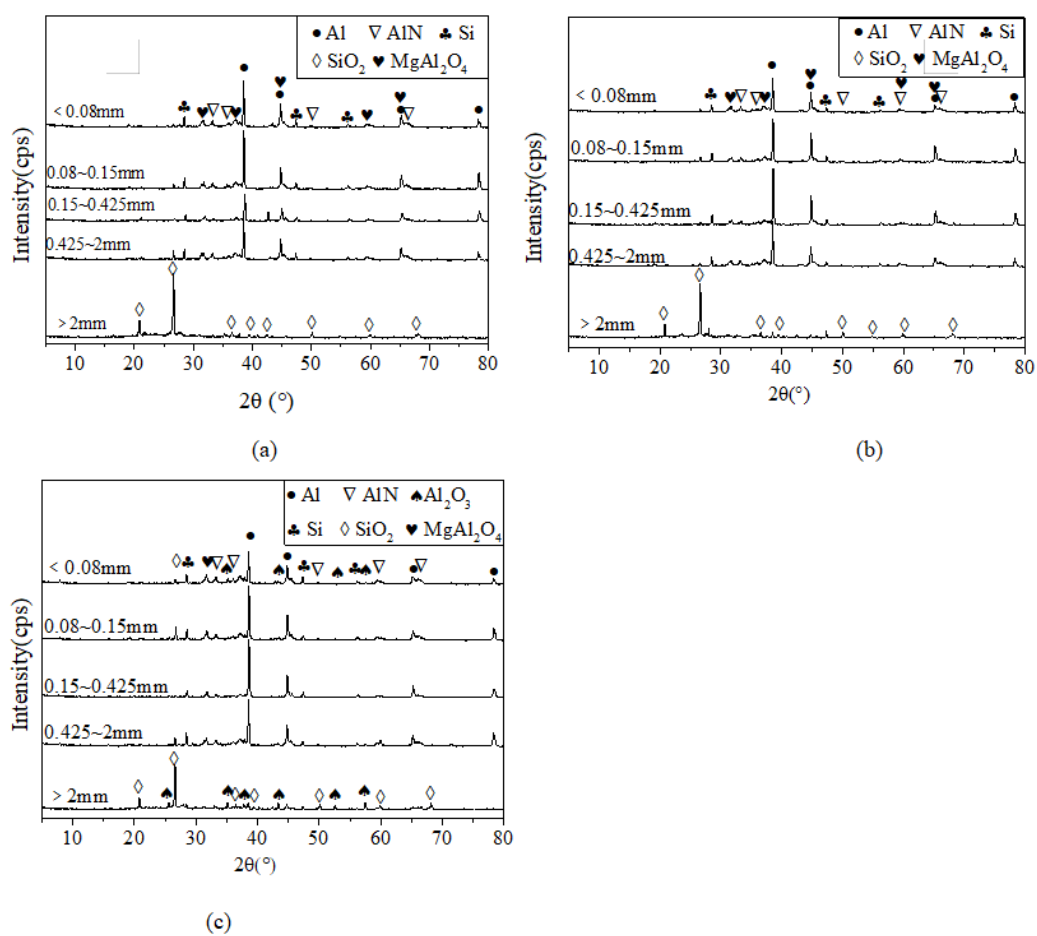

Figure S2 Results of XRD analyses of different particle sizes of AD after steel bar grinding: (a): 3 min; (b): 5 min; (c): 10 min

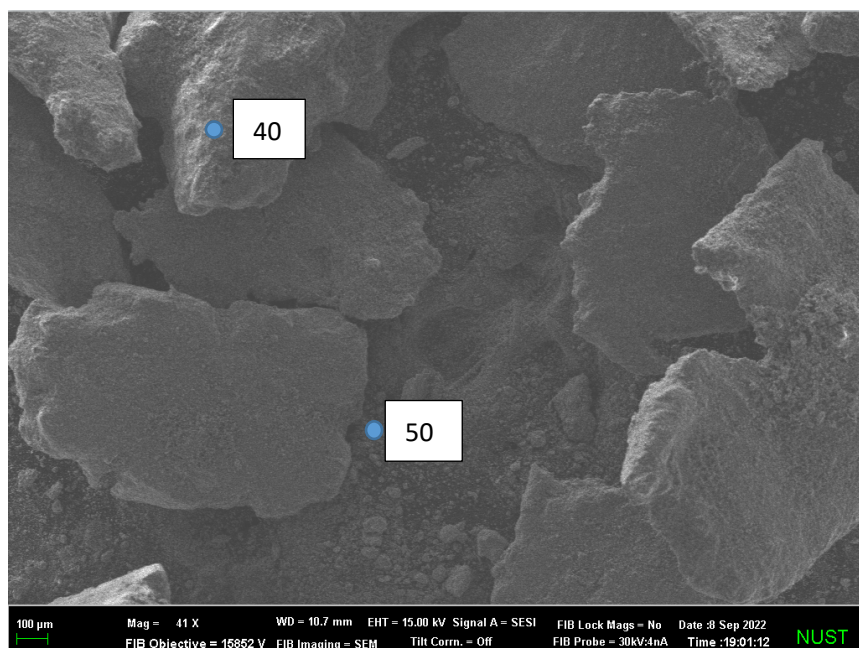

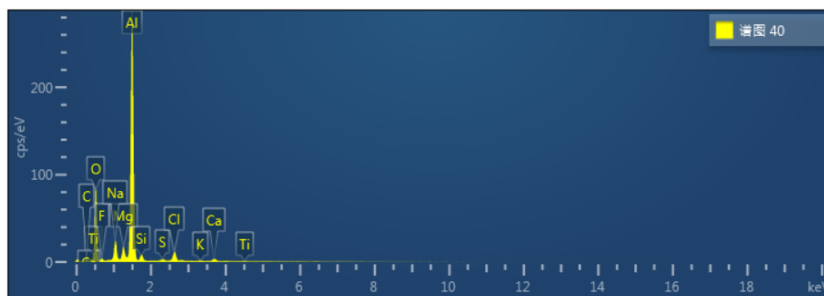

| 元素  | wt%    | wt% Sigma |
|-----|--------|-----------|
| C   | 5.52   | 0.89      |
| O   | 31.14  | 0.37      |
| F   | 1.53   | 0.12      |
| Na  | 4.15   | 0.09      |
| Mg  | 2.34   | 0.07      |
| Al  | 48.25  | 0.50      |
| Si  | 1.79   | 0.07      |
| S   | 0.52   | 0.05      |
| Cl  | 3.07   | 0.08      |
| K   | 0.30   | 0.05      |
| Ca  | 1.24   | 0.06      |
| Ti  | 0.14   | 0.06      |
| 总量: | 100.00 |           |

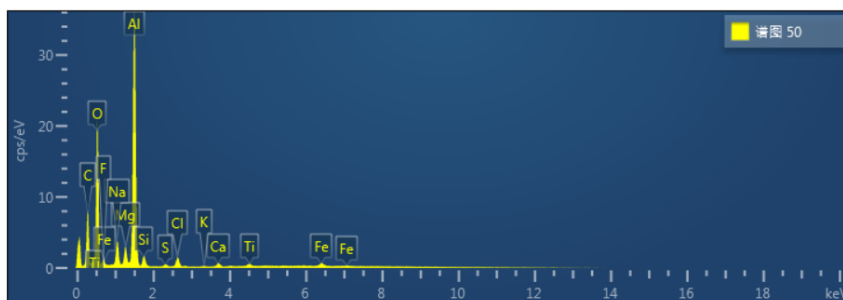

| 元素  | wt%    | wt% Sigma |
|-----|--------|-----------|
| C   | 29.28  | 0.69      |
| O   | 32.94  | 0.39      |
| F   | 1.86   | 0.15      |
| Na  | 2.75   | 0.07      |
| Mg  | 1.70   | 0.05      |
| Al  | 24.57  | 0.27      |
| Si  | 1.20   | 0.04      |
| S   | 0.29   | 0.03      |
| Cl  | 1.41   | 0.05      |
| K   | 0.14   | 0.03      |
| Ca  | 0.79   | 0.05      |
| Ti  | 0.81   | 0.07      |
| Fe  | 2.27   | 0.17      |
| 总量: | 100.00 |           |

(a)

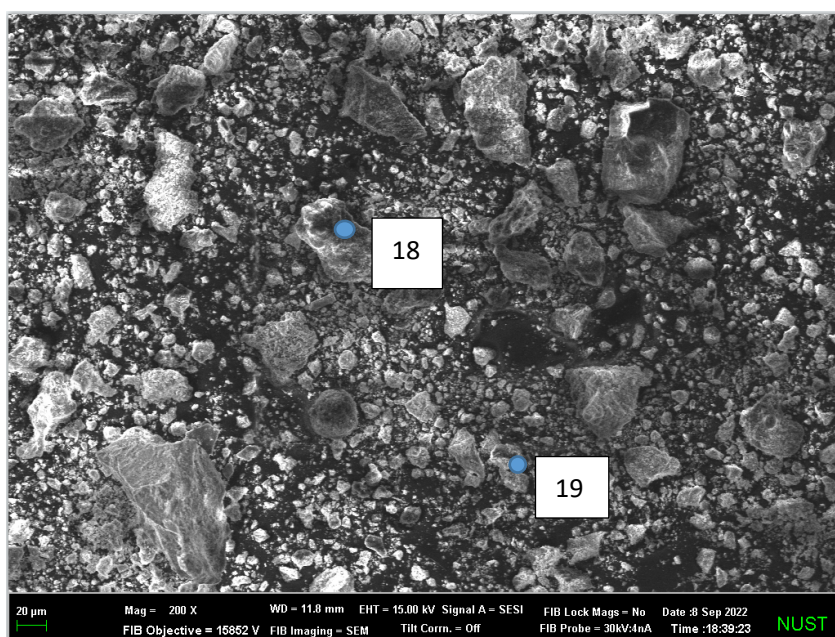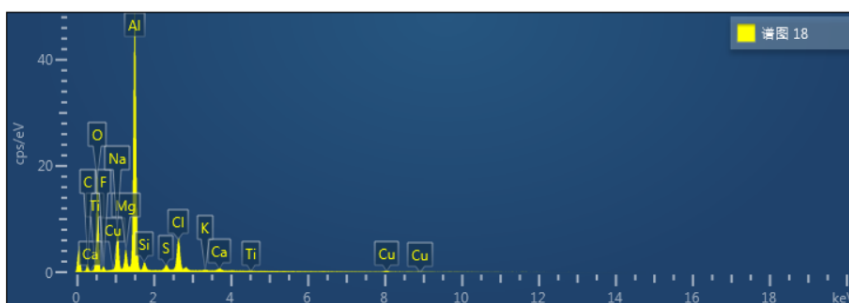

| 元素  | wt%    | wt% Sigma |
|-----|--------|-----------|
| C   | 10.96  | 0.94      |
| O   | 31.06  | 0.40      |
| F   | 1.99   | 0.13      |
| Na  | 6.28   | 0.12      |
| Mg  | 2.66   | 0.07      |
| Al  | 35.81  | 0.42      |
| Si  | 1.47   | 0.06      |
| S   | 1.09   | 0.05      |
| Cl  | 7.48   | 0.13      |
| K   | 0.22   | 0.05      |
| Ca  | 0.77   | 0.06      |
| Ti  | 0.21   | 0.07      |
| Cu  | 0.00   | 0.15      |
| 总量: | 100.00 |           |

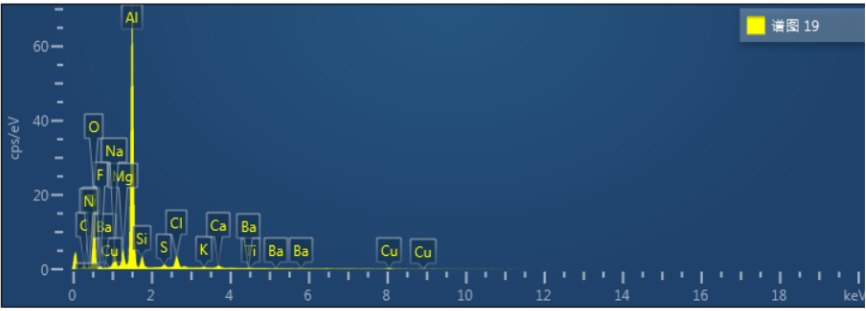

| 元素  | wt%    | wt% Sigma |
|-----|--------|-----------|
| C   | 7.25   | 1.06      |
| N   | 2.08   | 0.67      |
| O   | 30.74  | 0.52      |
| F   | 1.16   | 0.20      |
| Na  | 3.89   | 0.10      |
| Mg  | 2.68   | 0.08      |
| Al  | 43.40  | 0.63      |
| Si  | 2.71   | 0.08      |
| S   | 0.69   | 0.05      |
| Cl  | 3.35   | 0.09      |
| K   | 0.34   | 0.06      |
| Ca  | 0.97   | 0.07      |
| Ti  | 0.00   | 0.09      |
| Cu  | 0.00   | 0.14      |
| Ba  | 0.73   | 0.21      |
| 总量: | 100.00 |           |

(b)

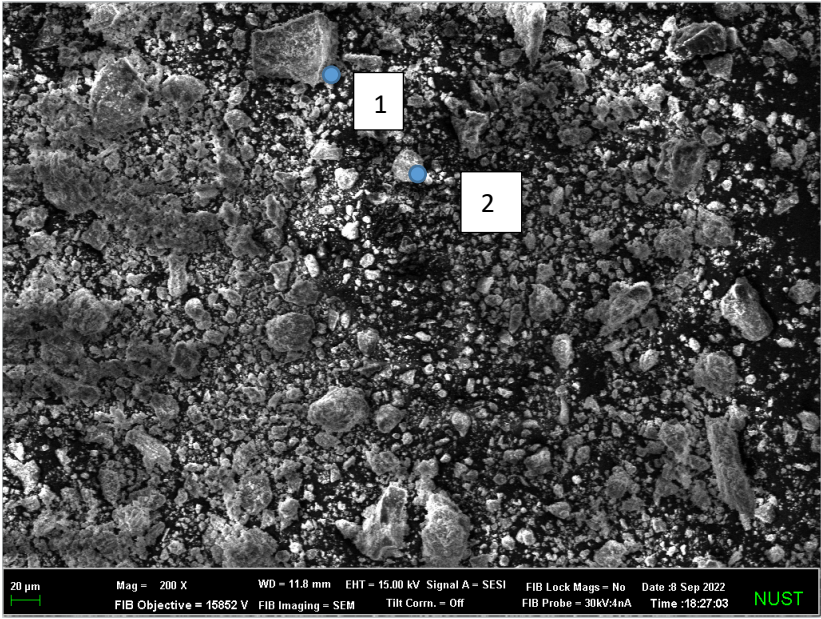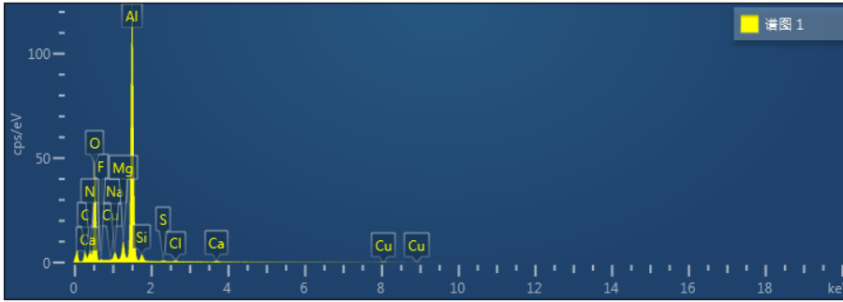

| 元素  | wt%    | wt% Sigma |
|-----|--------|-----------|
| N   | 10.85  | 0.45      |
| O   | 38.51  | 0.29      |
| F   | 0.74   | 0.14      |
| Na  | 1.52   | 0.07      |
| Mg  | 2.84   | 0.07      |
| Al  | 42.98  | 0.29      |
| Si  | 1.62   | 0.06      |
| S   | 0.19   | 0.04      |
| Cl  | 0.28   | 0.04      |
| Ca  | 0.42   | 0.05      |
| Cu  | 0.05   | 0.15      |
| 总量: | 100.00 |           |

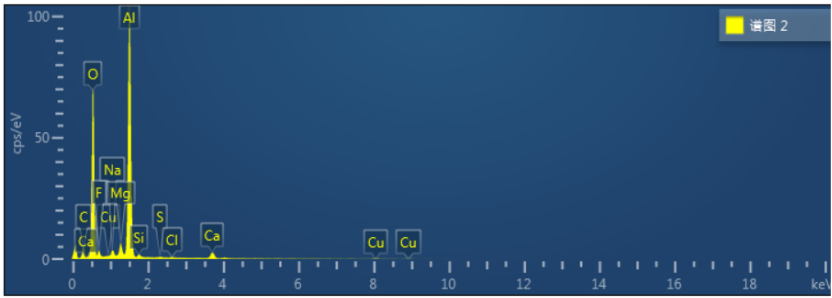

| 元素  | wt%    | wt% Sigma |
|-----|--------|-----------|
| O   | 48.16  | 0.21      |
| F   | 3.86   | 0.19      |
| Na  | 1.16   | 0.07      |
| Mg  | 2.02   | 0.06      |
| Al  | 41.49  | 0.19      |
| Si  | 0.62   | 0.05      |
| S   | 0.17   | 0.04      |
| Cl  | 0.17   | 0.04      |
| Ca  | 2.35   | 0.07      |
| Cu  | 0.00   | 0.16      |
| 总量: | 100.00 |           |

(c)

Figure S3 SEM-EDS of different particle size :(a):  $> 0.425\text{mm}$ ; (b):  $0.08\text{-}0.425\text{mm}$ ; (c):  $< 0.08\text{mm}$

Table S3 Subentry metallic Al content of different particle sizes aluminum dross after steel bar grinding time

| grinding<br>time | Dp><br>2 | Dp0.425-<br>2 | Dp0.15-<br>0.425 | Dp0.08-<br>0.15 | Dp<0.0<br>8 | sum       |
|------------------|----------|---------------|------------------|-----------------|-------------|-----------|
| 3min(%)          | 0.87     | 19.13         | 7.91             | 3.02            | 0.18        | 31.1<br>1 |
| 5min(%)          | 0.77     | 10.50         | 10.85            | 4.55            | 0.28        | 26.9<br>4 |
| 10min(%)         | 0.61     | 12.87         | 10.57            | 5.70            | 0.31        | 30.0<br>6 |

Table S4 recoverable metallic Al fraction by steel ball grinding

| grinding time | 0.425-2mm | 0.15-0.425mm |
|---------------|-----------|--------------|
| 3min(%)       | 21.87%    | 5.89%        |
| 5min(%)       | 23.20%    | 6.69%        |
| 10min(%)      | 25.40%    | 7.99%        |

Table S5 recoverable metal Al fraction by steel bar grinding

| grinding time | 0.425-2mm | 0.15-0.425mm |
|---------------|-----------|--------------|
| 3min(%)       | 20.04%    | 3.06%        |



|          |        |       |
|----------|--------|-------|
| 5min(%)  | 15.93% | 3.04% |
| 10min(%) | 17.70% | 4.49% |

Table S6 Al recovery rate of total Al by steel ball grinding

| grinding time | 0.425-2mm | 0.15-0.425mm |
|---------------|-----------|--------------|
| 3min(%)       | 46.5%     | 33.3%        |
| 5min(%)       | 54.3%     | 35.2%        |
| 10min(%)      | 64.9%     | 37.7%        |

Table S7 Al recoverable rate of total Al by steel bar grinding

| grinding time | 0.425-2mm | 0.15-0.425mm |
|---------------|-----------|--------------|
| 3min(%)       | 44.1%     | 11.3%        |
| 5min(%)       | 56.9%     | 8.8%         |
| 10min(%)      | 43.3%     | 14.9%        |

Table S8AIN fraction of different particle size by steel bar grinding

| grinding time | >2mm | 0.425-2mm | 0.15-0.425mm | 0.08-0.15mm | <0.08mm | sum   |
|---------------|------|-----------|--------------|-------------|---------|-------|
| 3min          | 0.17 | 1.81      | 14.49        | 6.10        | 0.25    | 22.83 |
| 5min          | 0.13 | 1.61      | 15.45        | 7.11        | 0.38    | 24.68 |
| 10min         | 0.08 | 1.35      | 17.33        | 9.45        | 0.28    | 28.49 |
